# Supplementary material for: Shuang-Huang-Lian Attenuates Airway Hyperresponsiveness and Inflammation in a Shrimp Protein-Induced Murine Asthma Model
Source: Hindawi journal article supplement (doi:10.1155/2019/4827342), 2019-01-01

## Supplementary Materials

**Fig S1. Effect of SHL on the viability of MLN cells.** Data are expressed as mean  $\pm$  SD (n = 3).

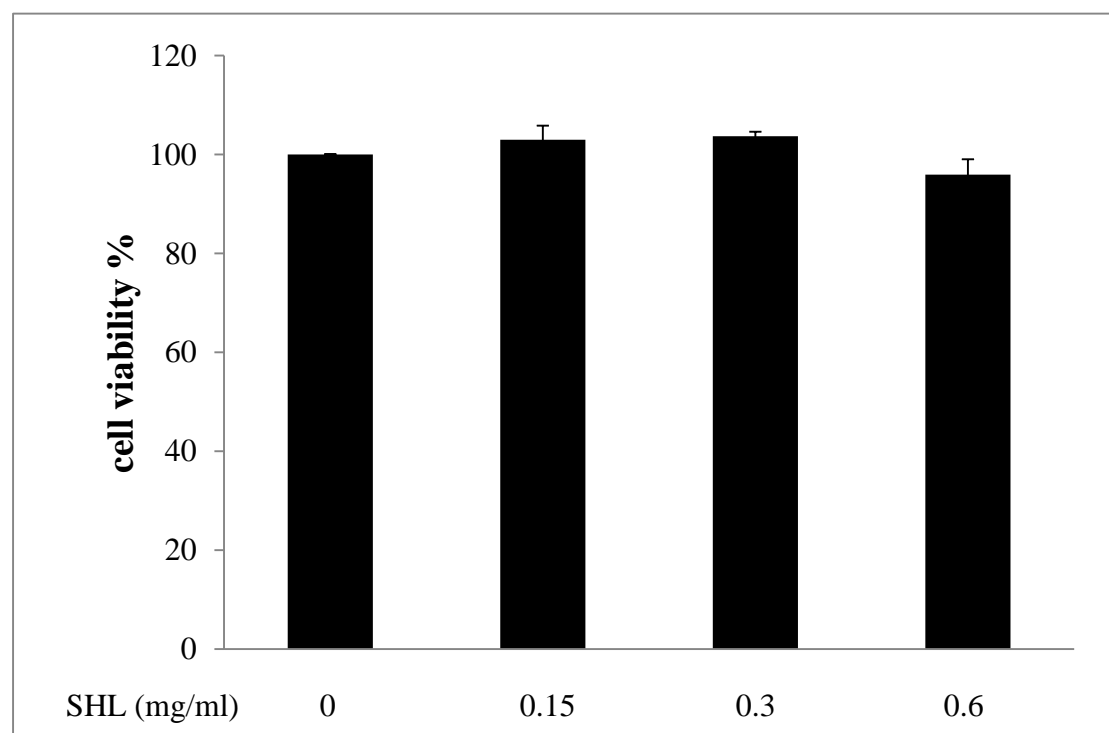

Supplement: f1 [file 4827342.f1.pdf]
